# Supplementary material
Source: PubMed Central journal article supplement (PMC1864885)
Supplement: amjpathol_170_3_941__1.pdf [file amjpathol_170_3_941__1.pdf]

**Supplemental Table 1A: MgCl<sub>2</sub> Concentrations Used in the Methylation-Specific PCR Assays**

| MgCl <sub>2</sub> (mM) | Gene Target                                                                |
|------------------------|----------------------------------------------------------------------------|
| 1.5                    | p14(M), p16(M), CDKN2B(M), DAPK1(M), GSTP1(M), MGMT(M), CDH1(M), PTEN(U&M) |
| 2                      | RASSF1A(U&M)                                                               |
| 2.5                    | p14(U), p16(U), CDKN2B(U), DAPK1(U), GSTP1(U), MGMT(U), CDH1(U)            |

U:unmethylated target; M:methylated target

**Supplemental Table 1B: Thermal Profiles for Methylation-Specific PCR Assays**

| Reaction Profile            | Thermal profile                                                                                                                                                   |
|-----------------------------|-------------------------------------------------------------------------------------------------------------------------------------------------------------------|
| Initial denaturation 10 min | 95°C                                                                                                                                                              |
| Denaturation 40 sec*        | 95°C                                                                                                                                                              |
| Annealing 45 sec cycles     | <b>56°C</b> for CDH1(U&M)<br><b>60°C</b> for RASSF1A(U&M), p14(U&M), p16(U&M),<br>CDKN2B(U&M), DAPK1(U&M), GSTP1(U&M) &<br>MGMT(U&M)<br><b>64°C</b> for PTEN(U&M) |
| Extension 45 sec            | 72°C                                                                                                                                                              |
| Final extension 7 min       | 72°C                                                                                                                                                              |

U:unmethylated target; M:methylated target; \* 30 sec for PTEN(U&M)

**Supplemental Table 1C: Assay Conditions and Thermal Profiles for Bisulfite PCR Assays**

| Assay Conditions             | Reaction Profile            | Thermal profile                                                                                                         |
|------------------------------|-----------------------------|-------------------------------------------------------------------------------------------------------------------------|
| 10X Buffer II 1X             | Initial denaturation 10 min | 95°C                                                                                                                    |
| MgCl <sub>2</sub> 3.0mM*     | Denaturation 40 sec         | 95°C                                                                                                                    |
| dNTP 200µM                   | Annealing 45 sec**          | <b>57°C</b> for HsPromoter, HsExon1,<br>MmExon1, and PTENxon1<br><b>60°C</b> for RhPromoter, RhExon1,<br>and MmPromoter |
| Forward primer 200nM         | Extension 45 sec**          | 72°C                                                                                                                    |
| Reverse primer 200nM         | Final extension 7 min       | 72°C                                                                                                                    |
| AmpliTaq Gold 1U             |                             |                                                                                                                         |
| Bisulfite converted DNA 80ng |                             |                                                                                                                         |
| Total reaction volume 25ml   |                             |                                                                                                                         |

\* 2.0mM for PTENxon1; \*\* 40 sec for PTENxon1

**Supplemental Table 1D: Assay Conditions and Thermal Profiles for Colony PCR Assays**

| Assay Conditions           | Reaction Profile            | Thermal profile           |
|----------------------------|-----------------------------|---------------------------|
| 10X Buffer II 1X           | Initial denaturation 10 min | 95°C                      |
| MgCl <sub>2</sub> 4.0mM    | Denaturation 1 min          | 95°C                      |
| dNTP 200µM                 | Annealing 1.5 min           | <b>55°C – 0.5°C/cycle</b> |
| Forward primer 100nM       | Extension 1 min             | 72°C                      |
| Reverse primer 100nM       | Denaturation 1 min          | 95°C                      |
| AmpliTaq Gold 1U           | Annealing 1.5 min           | 50°C                      |
| Template DNA colony        | Extension 1 min             | 72°C                      |
| Total reaction volume 25µl | Final extension 7 min       | 72°C                      |

**Supplemental Table 1E: Assay Conditions and Thermal Profiles for Real-Time Quantitative Methylation-Specific PCR**

| Assay Conditions             |             | Reaction Profile     |        | Thermal profile |
|------------------------------|-------------|----------------------|--------|-----------------|
| 10X Buffer A                 | 1X          | Initial denaturation | 10 min | 95°C            |
| MgCl <sub>2</sub>            | 4mM         | Denaturation         | 15 sec | 95°C            |
| dNTP                         | 200μM       | Annealing            | 15 sec |                 |
| Forward primer               | 200nM       | Extension            | 30 sec |                 |
| Reverse primer               | 200nM       |                      |        | 72°C            |
| TaqMan probe                 | 400nM       |                      |        |                 |
| AmpliTaq Gold                | 1U          |                      |        |                 |
| Bisulfite-converted DNA      | 80ng        |                      |        |                 |
| <i>Total reaction volume</i> | <i>25μl</i> |                      |        |                 |

**Supplemental Table 1F: Assay Conditions and Thermal Profiles for Real-Time RT-PCR for RASSF1A mRNA**

| Assay Conditions             |             | Reaction Profile      |        | Thermal profile |
|------------------------------|-------------|-----------------------|--------|-----------------|
| EZ RT-PCR Buffer             | 1X          | Annealing             | 2 min  | 50°C            |
| MnCl <sub>2</sub>            | 3mM         | Reverse transcription | 30 min | 60°C            |
| dATP, dCTP, dGTP             | 300μM       | Initial denaturation  | 2 min  | 95°C            |
| dUTP                         | 600μM       | Denaturation          | 20 sec | 94°C            |
| Forward primer               | 400nM       | Annealing & Extension | 1 min  |                 |
| Reverse primer               | 400nM       |                       |        | 60°C            |
| TaqMan probe                 | 200nM       |                       |        |                 |
| UNG                          | 0.25U       |                       |        |                 |
| <i>rTth</i>                  | 2.5U        |                       |        |                 |
| Total RNA                    | 450ng       |                       |        |                 |
| <i>Total reaction volume</i> | <i>25μl</i> |                       |        |                 |
