# Supplementary material
Source: PubMed Central journal article supplement (PMC1864885)
Supplement: amjpathol_170_3_941__2.pdf [file amjpathol_170_3_941__2.pdf]

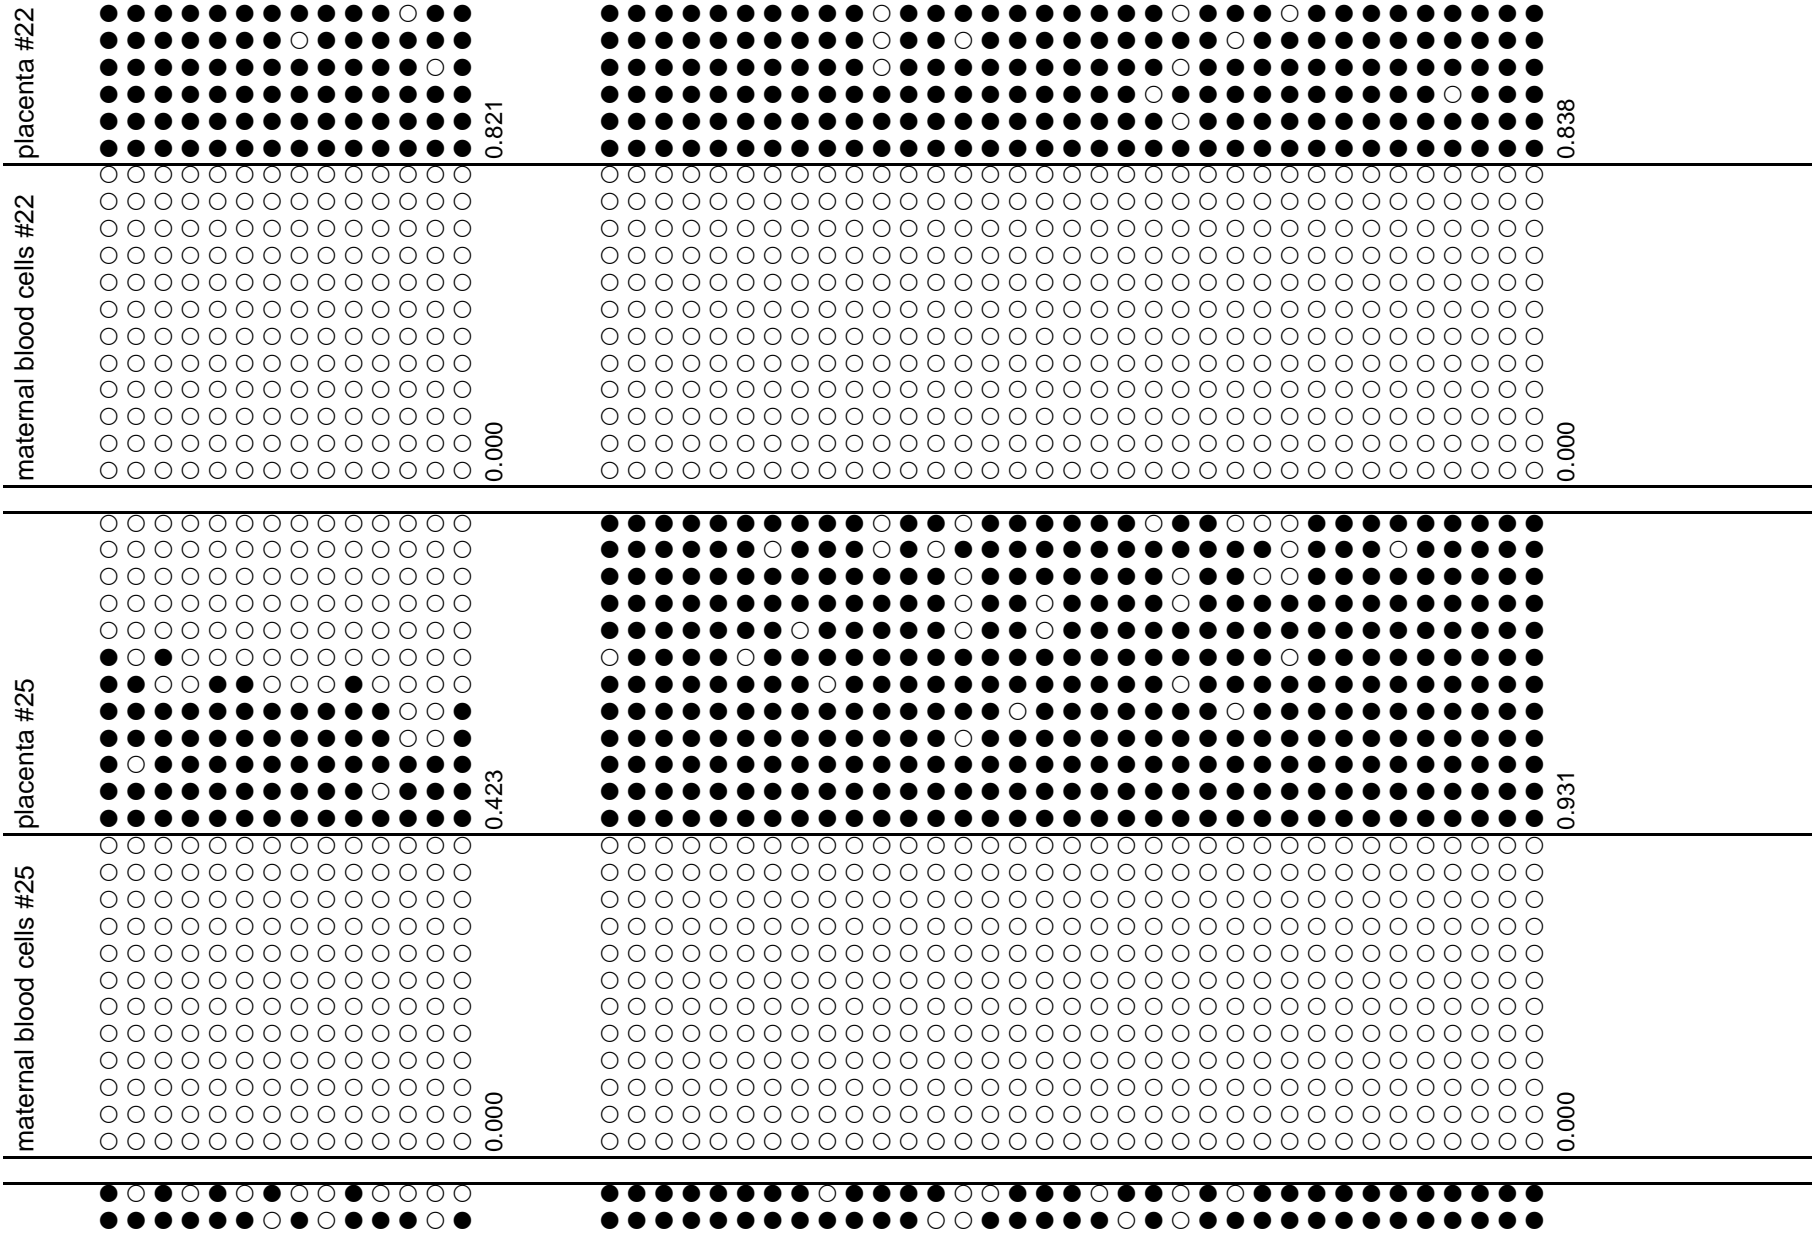

0.838

0.931

0.000

0.000

maternal blood cells #27

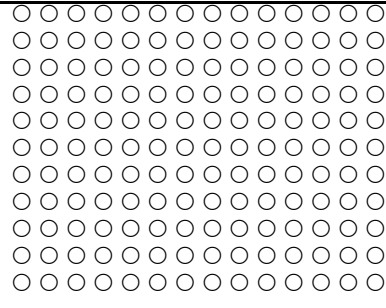

placenta #27

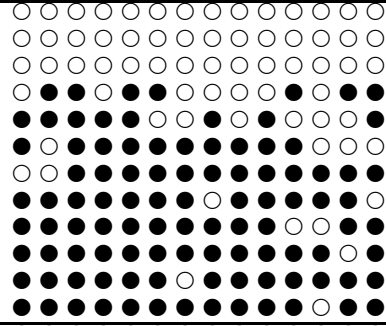

maternal blood cells #26

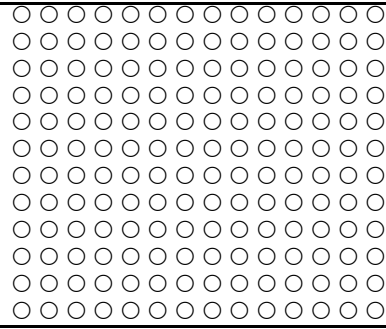

placenta #26

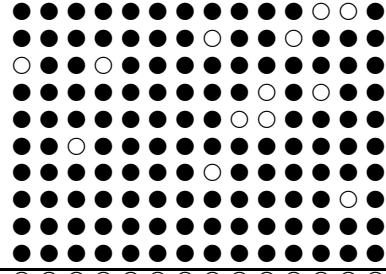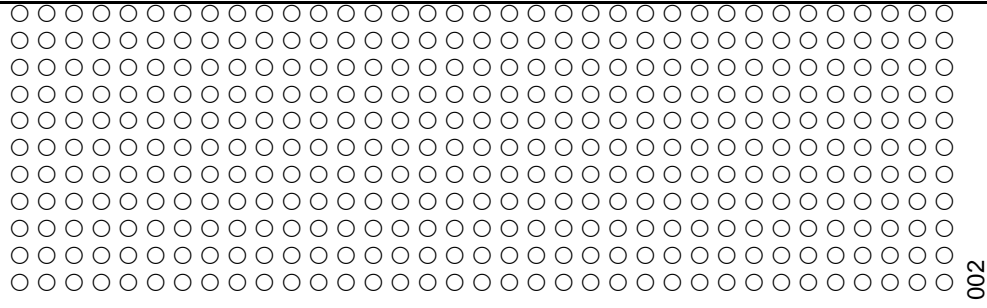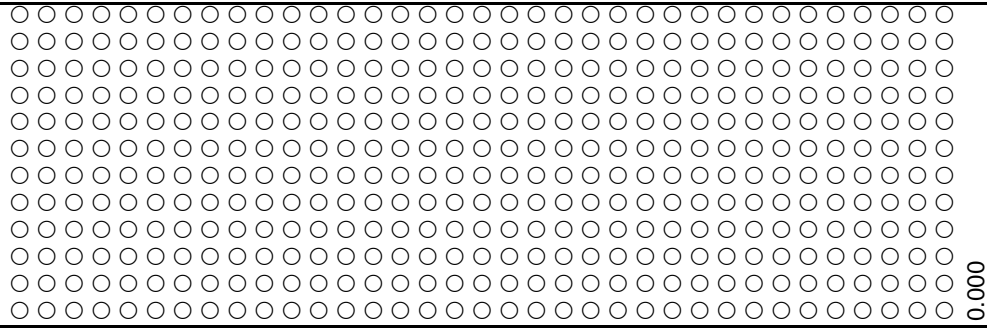

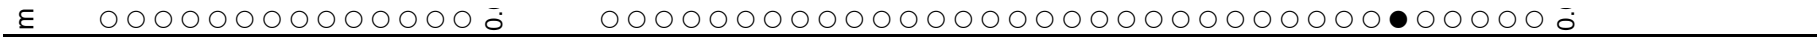

1The analyzed CpG sites are named according to the *RASSF1* (*Homo sapiens*) GenBank Accession NM\_007182 with the start codon of its protein coding sequence as position +1.

The first CpG site (-113) corresponds to chr3:50353354 (reverse strand) of the human genome in the UCSC Genome Browser (May 2004 assembly, hg17).

Filled and unfilled circles represent methylated and unmethylated CpG sites, respectively.
