# Supplementary material
Source: PubMed Central journal article supplement (PMC1864885)
Supplement: amjpathol_170_3_941__4.pdf [file amjpathol_170_3_941__4.pdf]

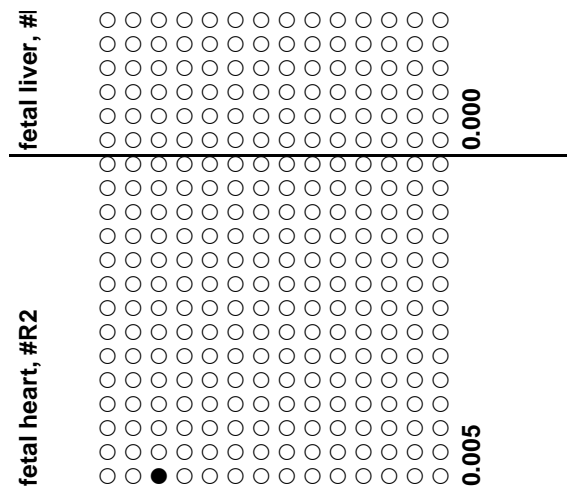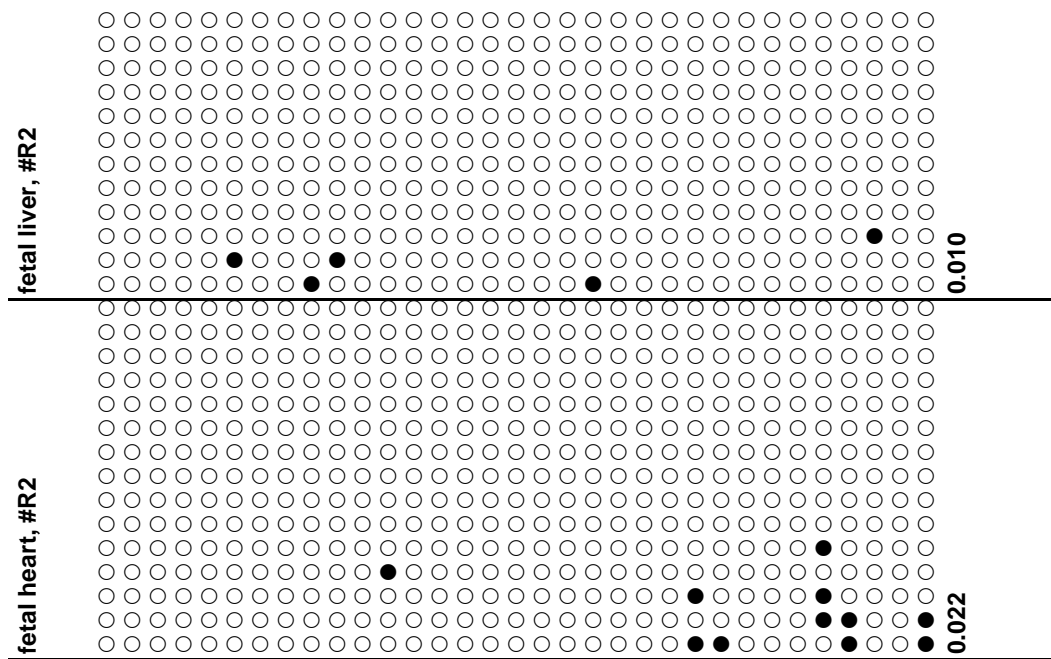

3The rhesus *Rassf1* genomic sequence is derived based on aligning the *RASSF1A* protein sequence for *Homo sapiens* (GenBank Accession: NP\_009113) with the genome of *Macaca mulatta* (UCSC genome browser, January 2005 assembly, Mmul\_0.1). Thus, the CpG sites are named with the start codon of the *RASSF1A* protein sequence (*Homo sapiens*) as position +1. The first CpG site (-155) corresponds to SCAFFOLD10178:43405 (forward strand) of Mmul\_0.1.
