# Supplementary material
Source: PubMed Central journal article supplement (PMC1864885)
Supplement: amjpathol_170_3_941__6.pdf [file amjpathol_170_3_941__6.pdf]

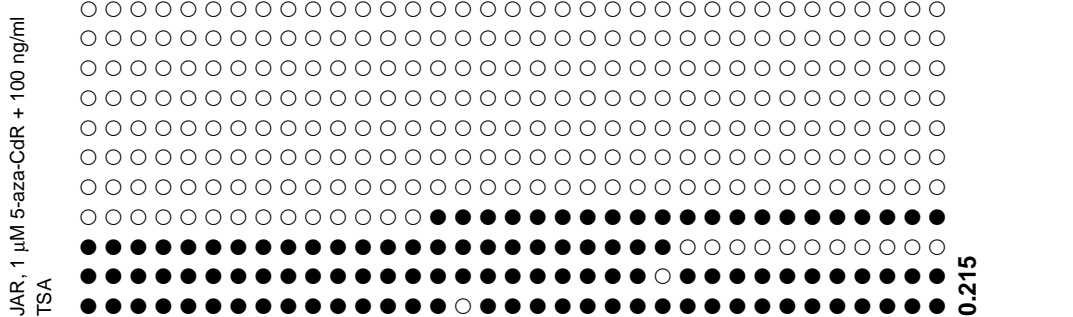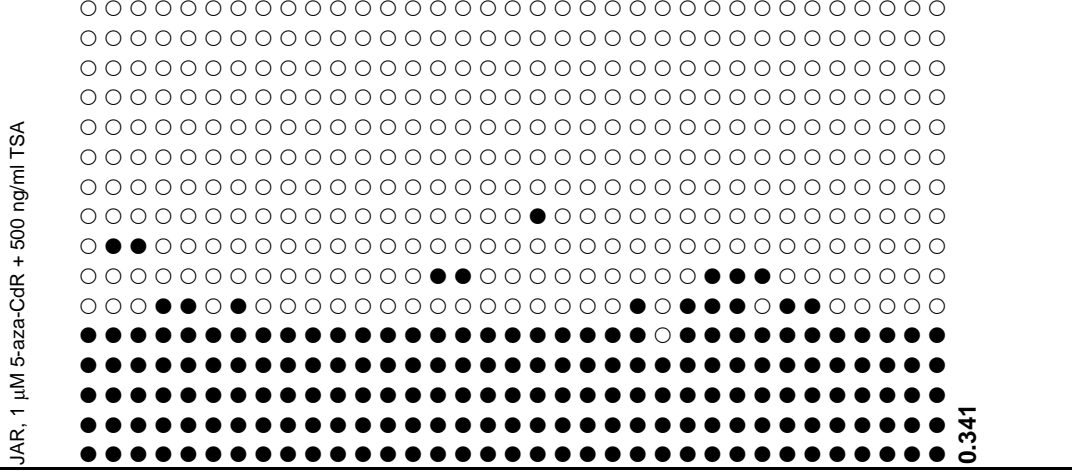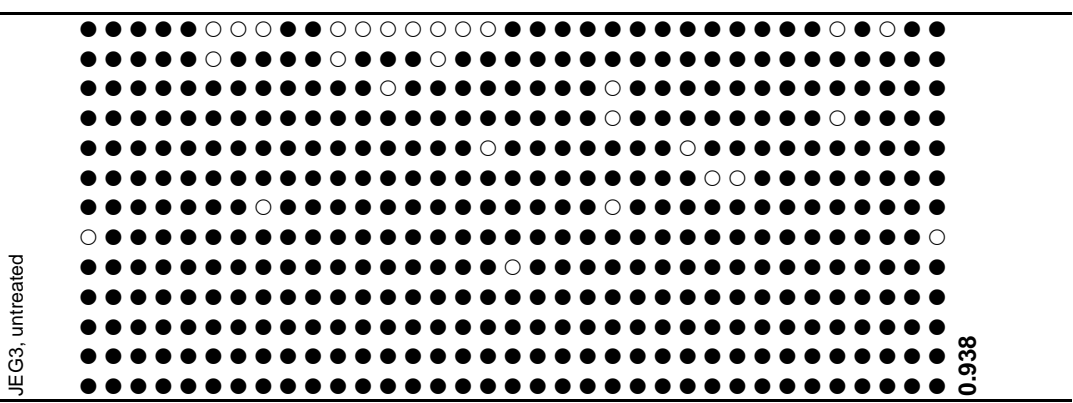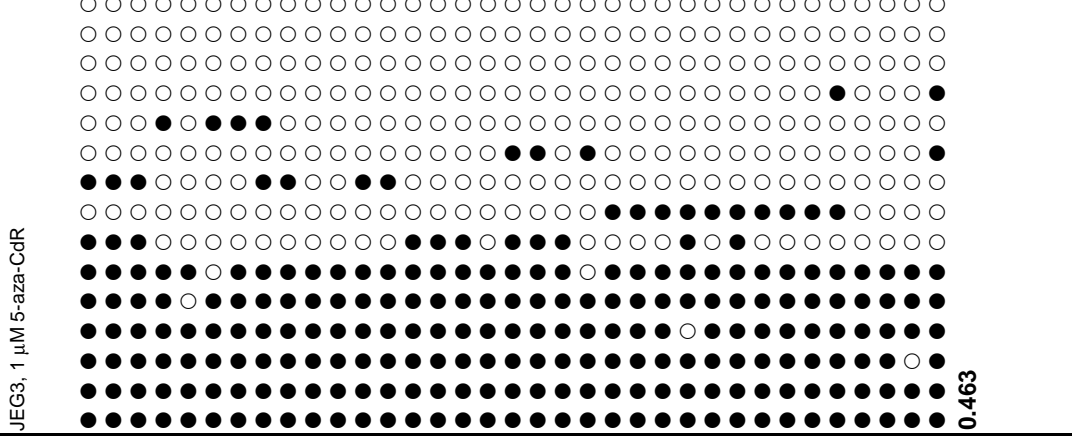

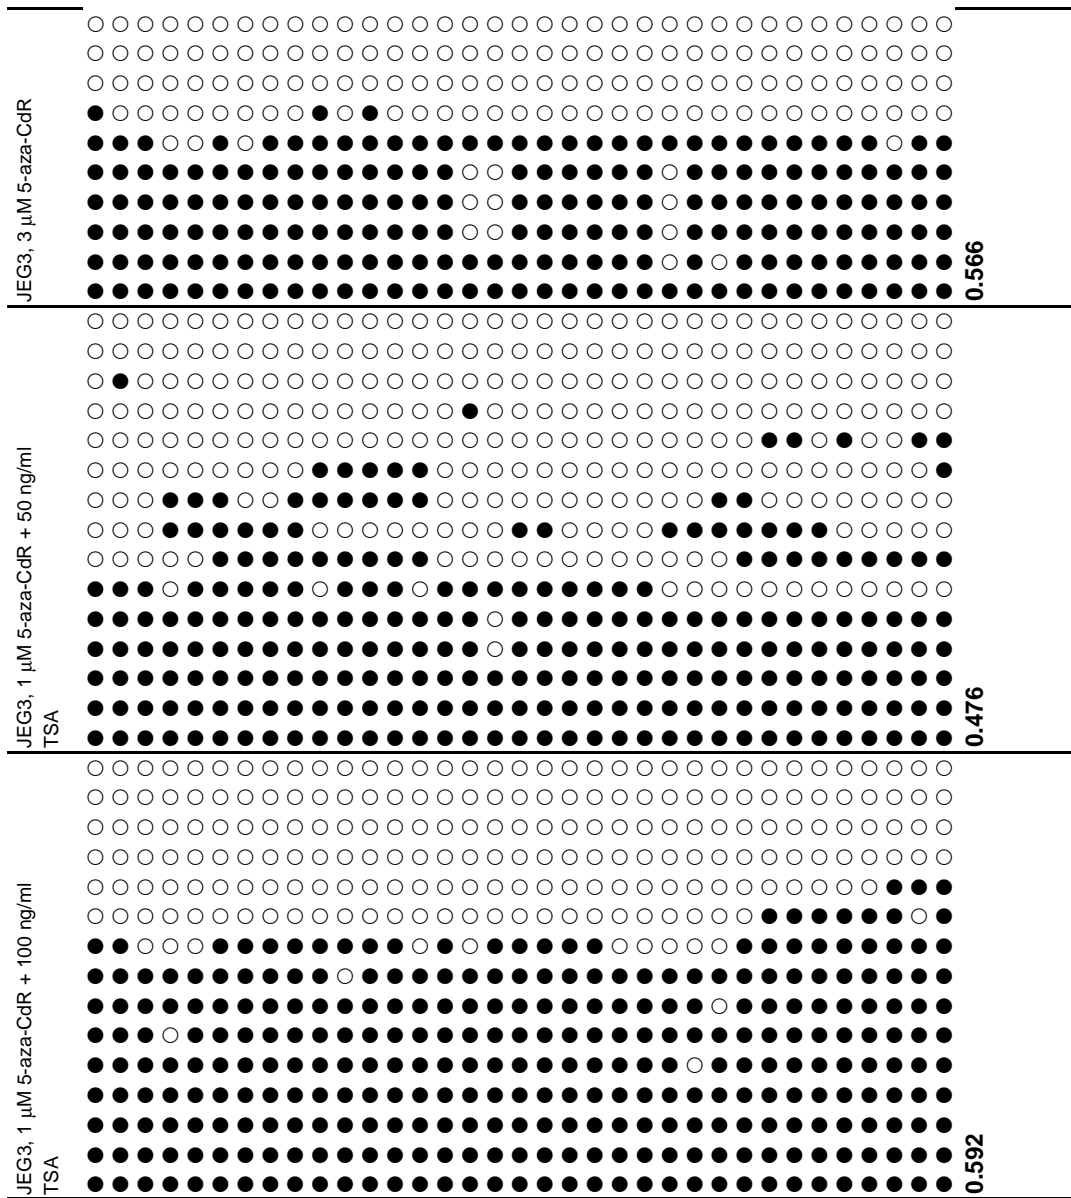

<sup>†</sup>The analyzed CpG sites are named according to the *RASSF1* (*Homo sapiens*) GenBank Accession NM\_007182 with the start codon of its protein coding sequence as position +1. The first CpG site (+45) corresponds to chr3:50353196 (reverse strand) of the human genome in the UCSC Genome Browser (May 2004 assembly, hg17).

Filled and unfilled circles represent methylated and unmethylated CpG sites, respectively.

5-Aza-CdR: 5-Aza-2'-deoxycytidine; TSA: trichostatin A.
